# Supplementary material for: Construction of cobalt oxyhydroxide nanosheets with rich oxygen vacancies as high-performance lithium-ion battery anodes
Source: Royal Society of Chemistry journal article supplement (doi:10.1039/d0ta10389f), 2020-12-10
Supplement: d0ta10389f1.pdf [file d0ta10389f1.pdf]

## Supporting Information

### **Construction of cobalt oxyhydroxide nanosheets with rich oxygen vacancies as high-performance lithium-ion batteries anodes**

Yonghuan Fu,<sup>‡a</sup> Liewu Li,<sup>‡ab</sup> Shenghua Ye,<sup>a</sup> Penggang Yang,<sup>a</sup> Peng Liao,<sup>d</sup> Xiangzhong Ren,<sup>a</sup> Chuanxin He,<sup>a</sup> Qianling Zhang<sup>\*a</sup> and Jianhong Liu<sup>\*ac</sup>

<sup>a</sup>Graphene Composite Research Center, College of Chemistry and Environmental Engineering, Shenzhen University, Shenzhen, 518060, P. R. China

<sup>b</sup>College of Physics and Optoelectronic Engineering, Shenzhen University, Shenzhen, 518060, China

<sup>c</sup>Shenzhen Eigen-Equation Graphene Technology Co. Ltd, Shenzhen, 518000, P. R. China

<sup>d</sup>Department of Cell Research and Development, Farasis Energy Inc., Hayward, California, 94545, USA

**\*E-mail address of the corresponding author: zhql@szu.edu.cn; liujh@szu.edu.cn**

<sup>‡</sup>Yonghuan Fu and Liewu Li contributed equally to this work.

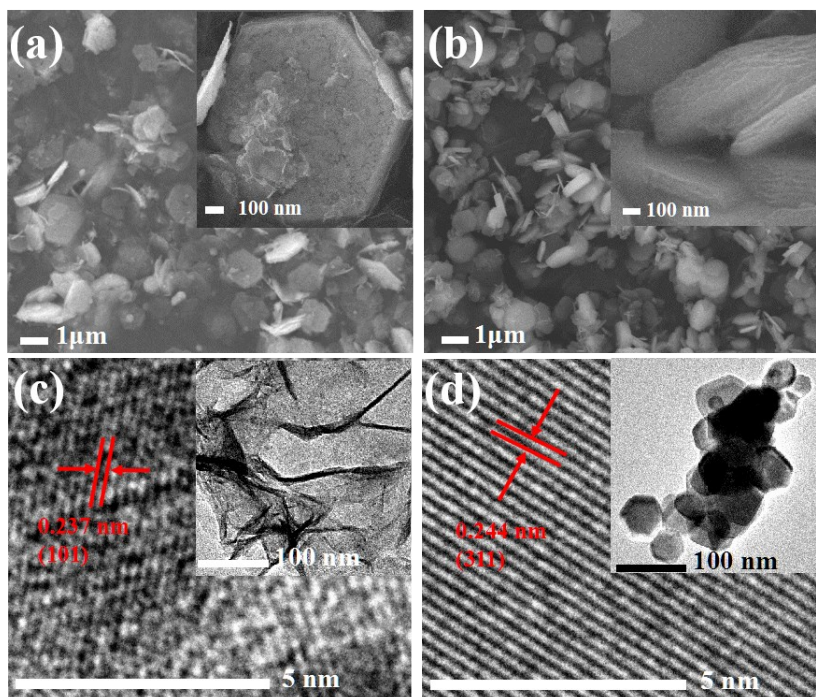

**Fig. S1** SEM images of  $\text{Co(OH)}_2$  (a) and  $\text{Co}_3\text{O}_4$  (b); TEM images of  $\text{Co(OH)}_2$  (c) and  $\text{Co}_3\text{O}_4$  (d).

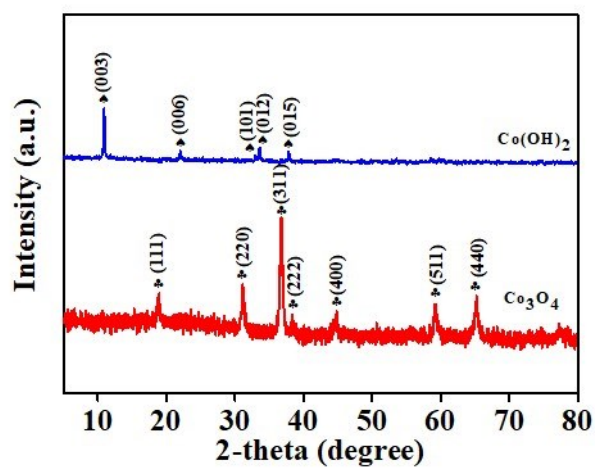

**Fig. S2** XRD patterns of  $\text{Co(OH)}_2$  and  $\text{Co}_3\text{O}_4$ .

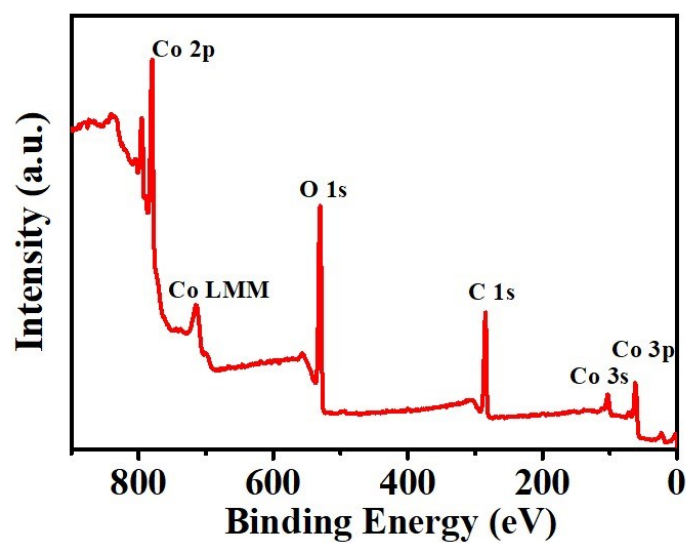

Fig. S3 XPS spectrum of CoOOH nanosheets.

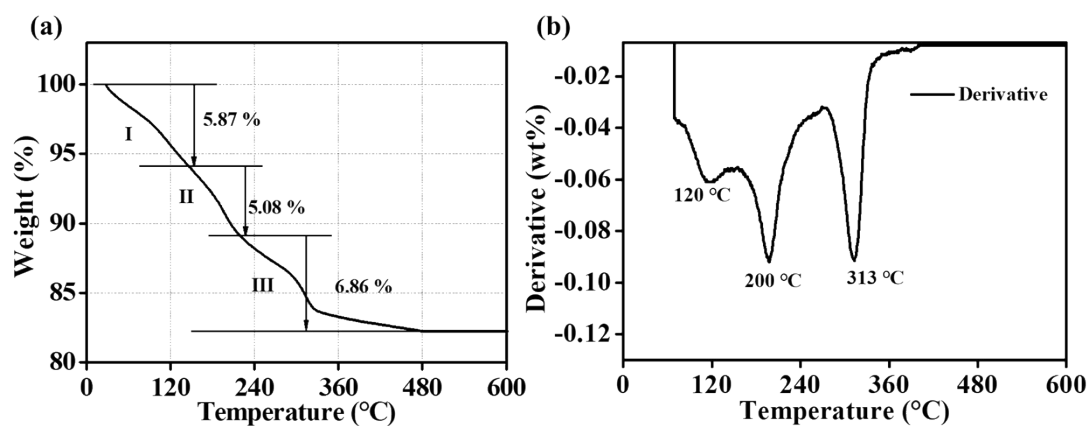

Fig. S4 (a) TG profile of CoOOH nanosheets; (b) TGA profile of CoOOH nanosheets.

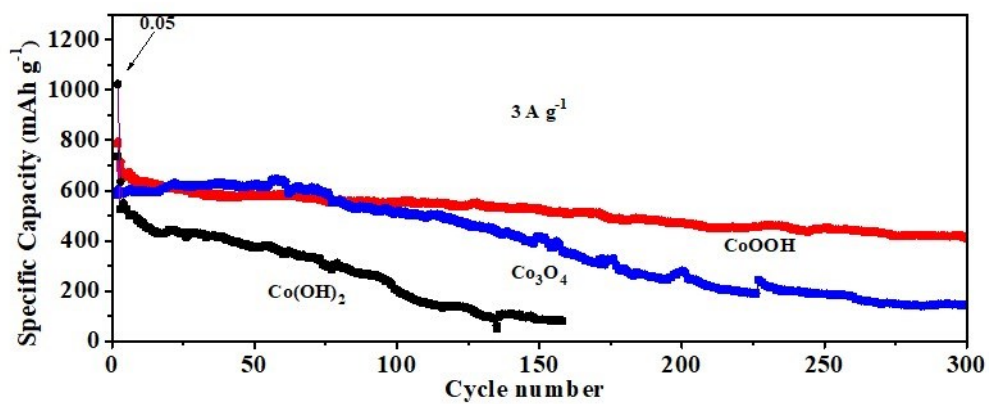

Fig. S5 Cycling performance of CoOOH, Co(OH)<sub>2</sub>, and Co<sub>3</sub>O<sub>4</sub> electrodes at 3 A g<sup>-1</sup>.

**Table S1.** Comparison of cycling stability and initial coulombic efficiency of CoOOH anode with previously reported cobalt oxide anodes for LIBs.

| Anode materials                                                              | Current density<br>(mA g <sup>-1</sup> ) | Cycle<br>number | Capacity<br>retention<br>(mAh g <sup>-1</sup> ) | Initial coulombic<br>efficiency (%) | Refs         |
|------------------------------------------------------------------------------|------------------------------------------|-----------------|-------------------------------------------------|-------------------------------------|--------------|
| Co <sub>3</sub> O <sub>4</sub> nanosheets                                    | 200                                      | 100             | 1717                                            | ~68                                 | [1]          |
| CoOOH in Lithium–Sulfur Battery                                              | 0.1C (about 100)                         | 100             | 1199.4                                          | --                                  | [2]          |
| The composite materials of mica<br>flake and cobalt oxide                    | 225                                      | 70              | 650                                             | --                                  | [3]          |
| The yolk–shell Co <sub>3</sub> O <sub>4</sub> /C                             | 200                                      | 120             | 1100                                            | ~71                                 | [4]          |
| N-Doped Carbon/Cobalt Ferrite<br>Hybrid Nanocomposites                       | 3000                                     | 300             | 410                                             | ~78                                 | [5]          |
| Nanoarchitected Co <sub>3</sub> O <sub>4</sub> /reduced<br>graphene oxide    | 1C(about 1000)                           | 200             | 513.9                                           | --                                  | [6]          |
| Co <sub>3</sub> O <sub>4</sub> nanotubes                                     | 100                                      | 80              | 380                                             | ~58.7                               | [7]          |
| nanoparticles-assembled<br>microspheres                                      | Co <sub>3</sub> O <sub>4</sub> 200       | 50              | 1340                                            | ~73                                 | [8]          |
| Oxidizing solid Co into hollow<br>Co <sub>3</sub> O <sub>4</sub>             | 200                                      | 500             | 871.5                                           | ~66.7                               | [9]          |
| Co <sub>2</sub> (OH) <sub>2</sub> CO <sub>3</sub> nanowires and rGO<br>films | 200                                      | 150             | 1380                                            | ~71.7                               | [10]         |
| CoOOH nanosheets                                                             | 200                                      | 300             | 1588                                            | ~90                                 | This<br>work |

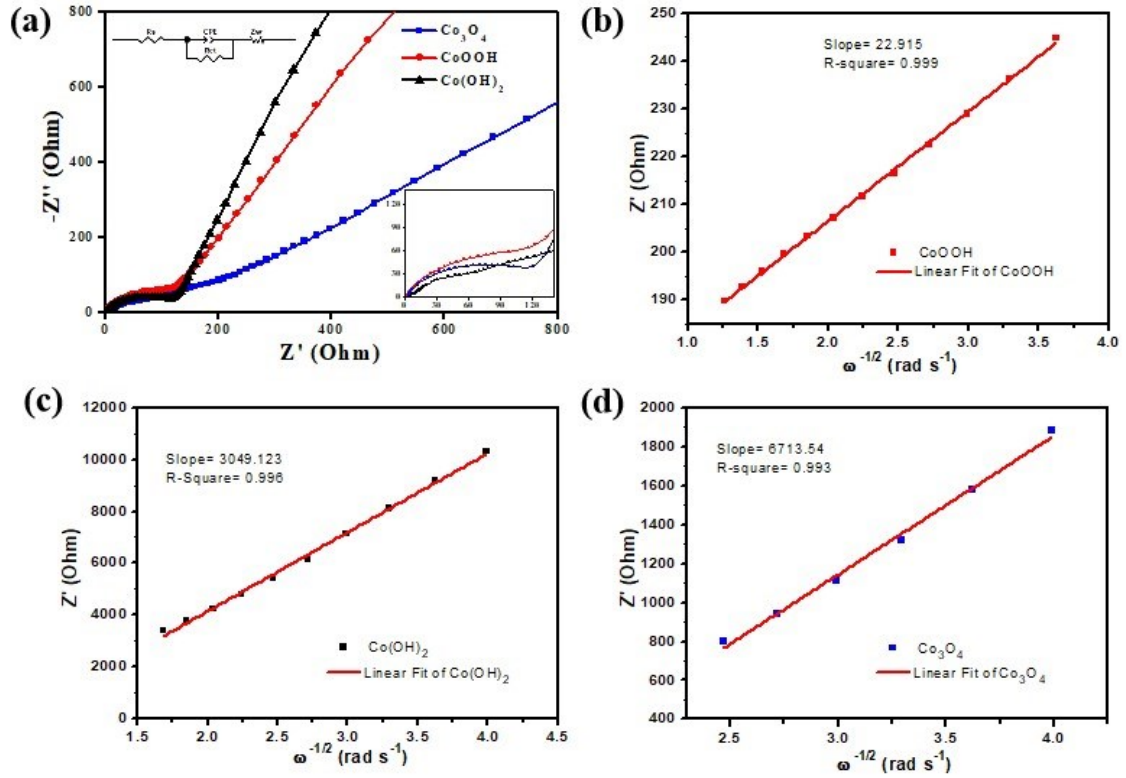

**Fig. S6** (a) Nyquist plots of CoOOH, Co(OH)<sub>2</sub>, and Co<sub>3</sub>O<sub>4</sub> electrodes (insets show the equivalent circuits for EIS fitting and the detail of Nyquist plots); (b) The relationship between  $I_{\text{peak}}$  and  $\nu^{1/2}$  for CoOOH electrode; (c) The relationship between  $I_{\text{peak}}$  and  $\nu^{1/2}$  for Co(OH)<sub>2</sub> electrode; (d) The relationship between  $I_{\text{peak}}$  and  $\nu^{1/2}$  for Co<sub>3</sub>O<sub>4</sub> electrode.

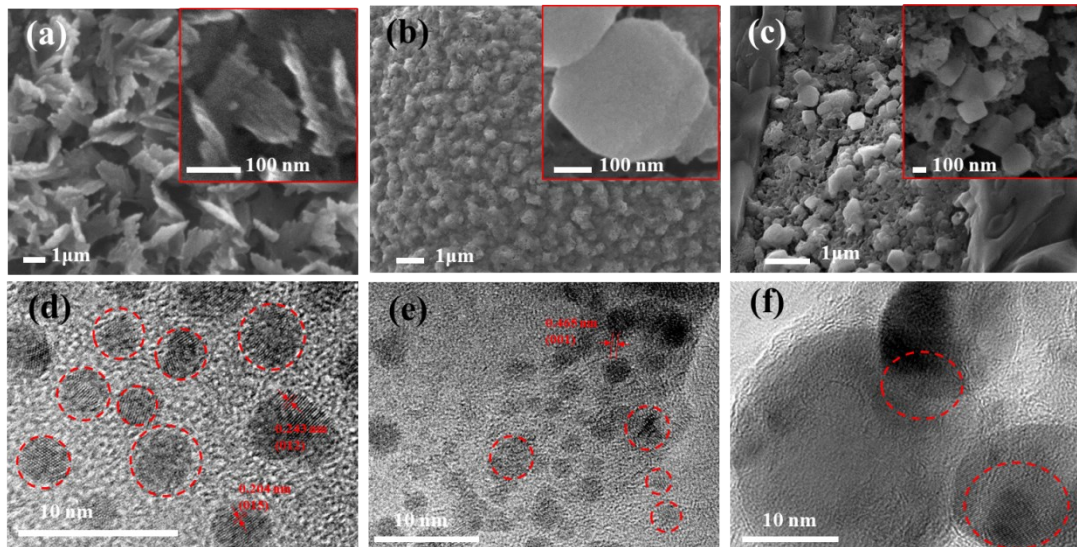

**Fig. S7** SEM and High-resolution TEM images of CoOOH (a, d), Co(OH)<sub>2</sub> (b, e), and Co<sub>3</sub>O<sub>4</sub> (c, f) electrodes after 300 cycles.



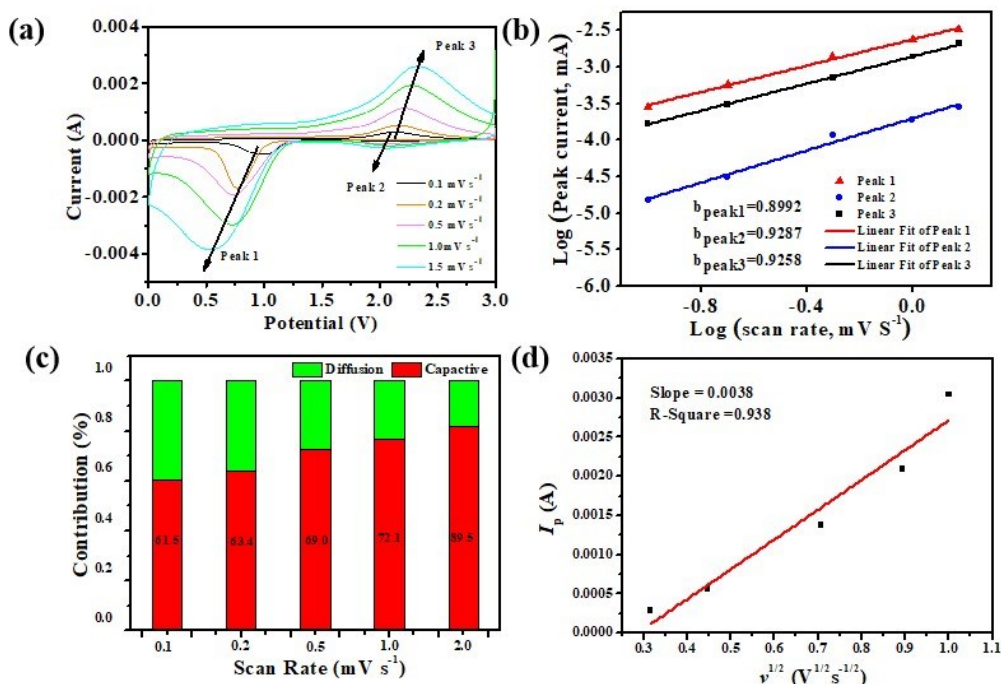

**Fig. S8** Kinetic analysis of the electrochemical behavior of the  $\text{Co}_3\text{O}_4$  electrode versus  $\text{Li}^+/\text{Li}$ . (a) CV curves at various scan rates ranging from 0.1 to 1.5  $\text{mV s}^{-1}$ ; (b) Determination of  $b$  values using the relationship between the peak current and scan rate according to the voltammograms in (a); (c) Contribution ratios of the capacitive and diffusion-controlled effects at various scan rates; (d) The relationship between  $I_p$  and  $v^{1/2}$ .

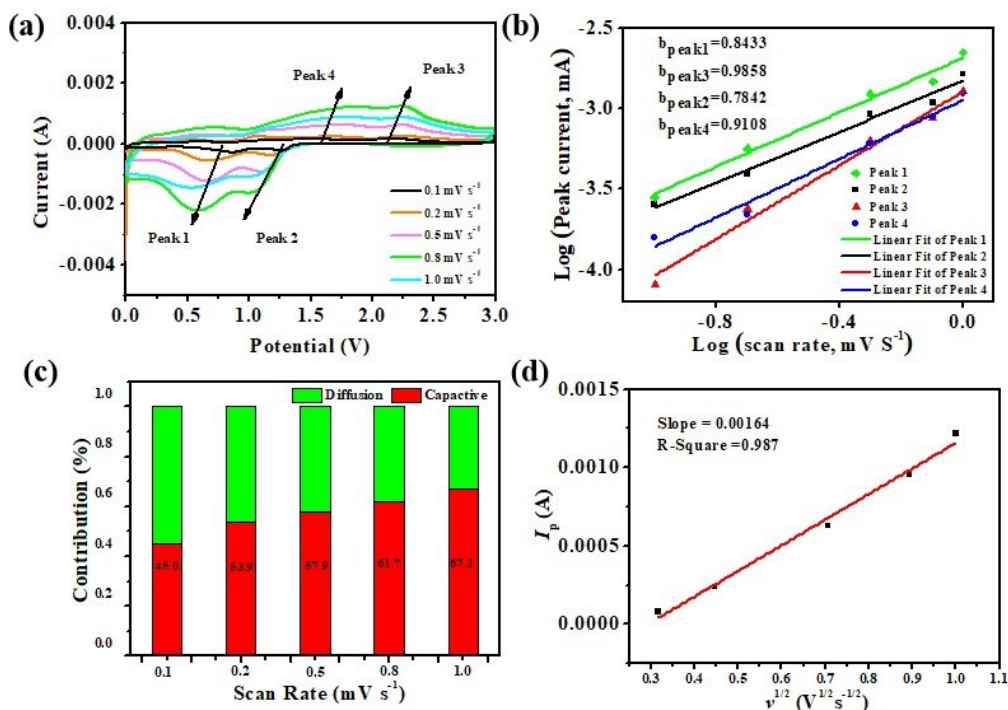

**Fig. S9** Kinetic analysis of the electrochemical behavior of the  $\text{Co}(\text{OH})_2$  electrode versus  $\text{Li}^+/\text{Li}$ . (a) CV curves at various scan rates ranging from 0.1 to 1.0  $\text{mV s}^{-1}$ ; (b) Determination of  $b$  values using the relationship between the peak current and scan rate according to the voltammograms in (a); (c) Contribution ratios of the capacitive and diffusion-controlled effects at various scan rates; (d) The relationship between  $I_p$  and  $v^{1/2}$ .

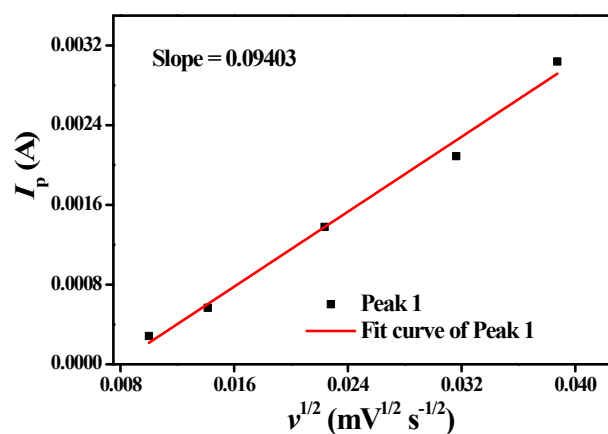

**Fig. S10** The relationship between  $I_p$  and  $v^{1/2}$  for the CoOOH electrode.

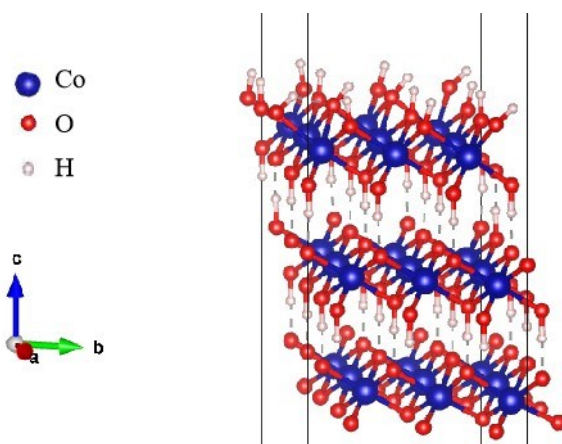

**Fig. S11** A  $3 \times 3$  supercell of the CoOOH (001) crystal surface including 3 atomic layers model.

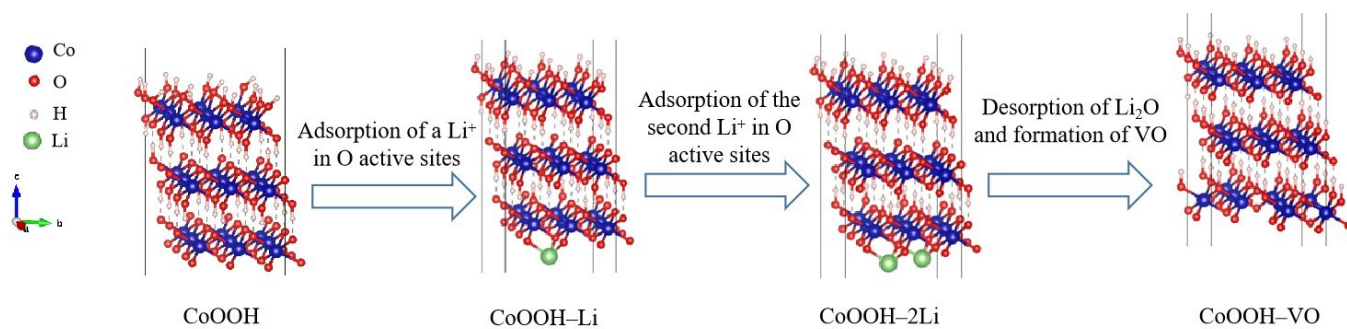

**Fig. S12** The model of the process for adsorption of  $\text{Li}^+$  in O active sites, desorption of  $\text{Li}_2\text{O}$  and formation of VO.

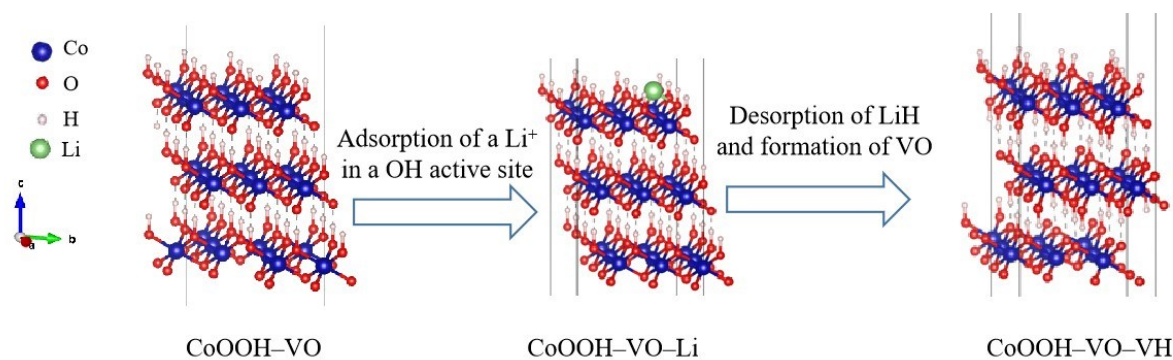

**Fig. S13** The model of the process for adsorption of  $\text{Li}^+$  in a OH active site and formation of LiH or LiOH; desorption of LiH and formation of CoOOH-VO-VH.

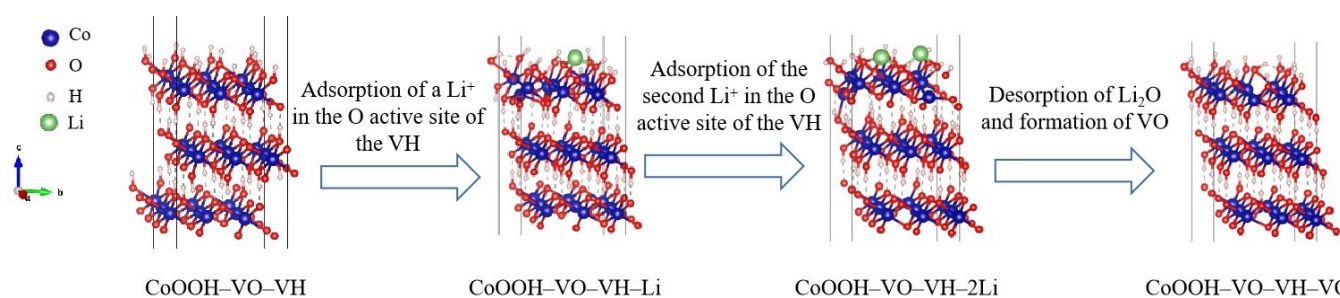

**Fig. S14** The model of the process for adsorption of  $\text{Li}^+$  in the O active site of the VH; desorption of  $\text{Li}_2\text{O}$  and formation of CoOOH-VO-VH-VO.

## References

1. R. Wei, X. Zhou, T. Zhou, J. Hu and J. C. Ho, *J. Phys. Chem. C.*, 2017, **121**, 19002-19009.
2. Z. Y. Wang, L. Wang, S. Liu, G. R. Li and X. P. Gao, *Adv. Funct. Mater.*, 2019, **29**, 1901051.
3. L. Kong, J. Lang, M. Liu, Y. Luo and L. Kang, *J. Power Sources*, 2009, **194**, 1194-1201.
4. Y. Wu, J. Meng, Q. Li, C. Niu, X. Wang, W. Yang, W. Li and L. Mai, *Nano Res.*, 2017, **10**, 2364-2376.
5. N. Dang, T. Nguyen, E. Lizundia, T. Le and M. J. MacLachlan, *ChemistrySelect*, 2020, **5**, 8207-8217.
6. Z. Chen, Y. Gao, X. Chen, B. Xing, C. Zhang, S. Wang, T. Liu, Y. Liu and Z. Zhang, *Ionics*, 2019, **25**, 5779-5786.
7. X. Lou, D. Deng, J. Lee, J. Feng and L. A. Archer, *Adv. Mater.*, 2008, **20**, 258-262.
8. T. Li, X. Li, Z. Wang, H. Guo, Q. Hu and W. Peng, *Electrochim. Acta*, 2016, **209**, 456-463.
9. J. Wang, H. Wang, F. Li, S. Xie, G. Xu, Y. She, M. K. H. Leung and T. Liu, *J. Mater. Chem. A.*, 2019, **7**, 3024-3030.



10. Y. Dong, Y. Ma, Y. Li, M. Niu, J. Yang, X. Song, D. Li, Y. Liu and J. Zhang, *Nanoscale*, 2019, **11**, 21180-21187.
